# Supplementary material for: Immunoreactive peptide maps of SARS-CoV-2
Source: PubMed Central journal article supplement (PMC7881038; doi:10.1038/s42003-021-01743-9), 2021-02-12
Supplement: 42003_2021_1743_MOESM1_ESM.pdf [file 42003_2021_1743_MOESM1_ESM.pdf]

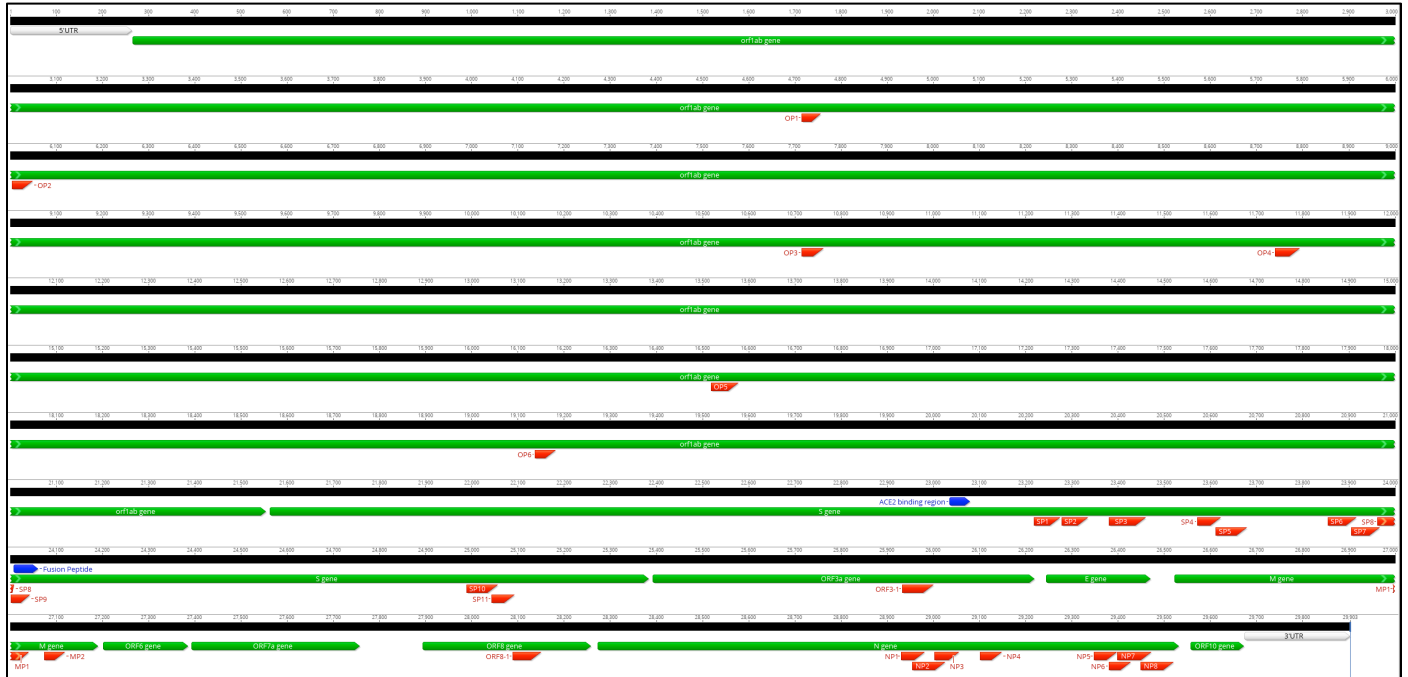

Supplementary figure 1. Notation of twenty-nine immunogenic B cell IgG epitopes on the proteome of SARS-CoV-2 (Accession number MN908947)

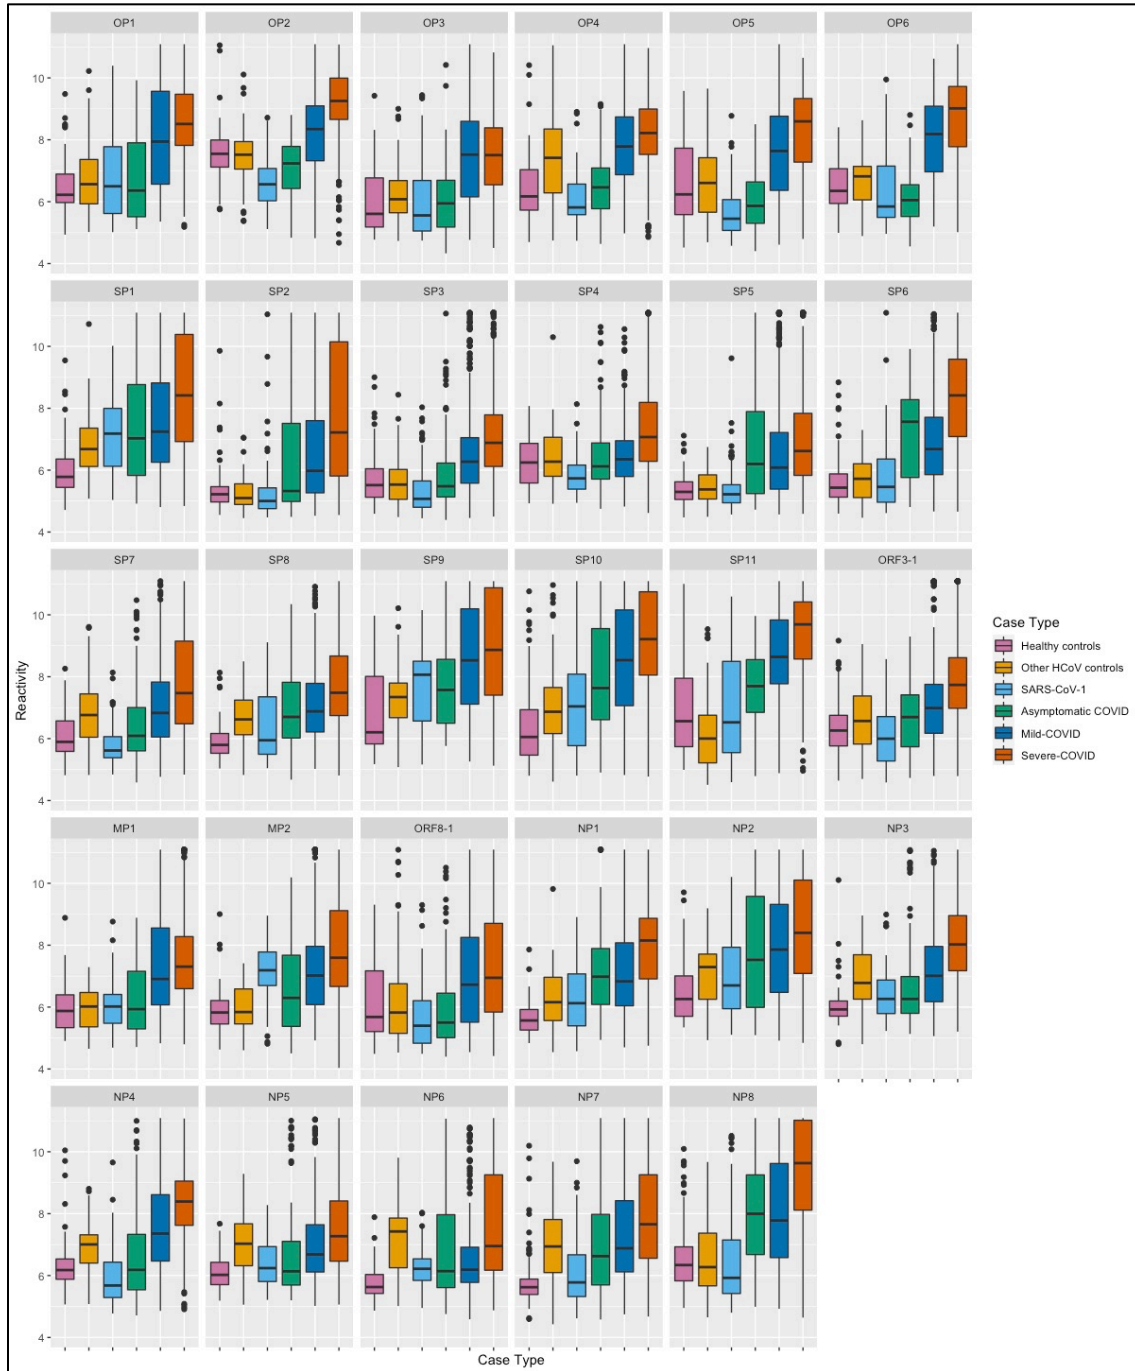

Supplementary figure 2. Reactivity intensities of each peptide from 29 immunogenic linear IgG epitopes are plotted on log scale (y-axis). Reactivity to selected peptides is plotted for corresponding groups shown in different colors (x-axis).

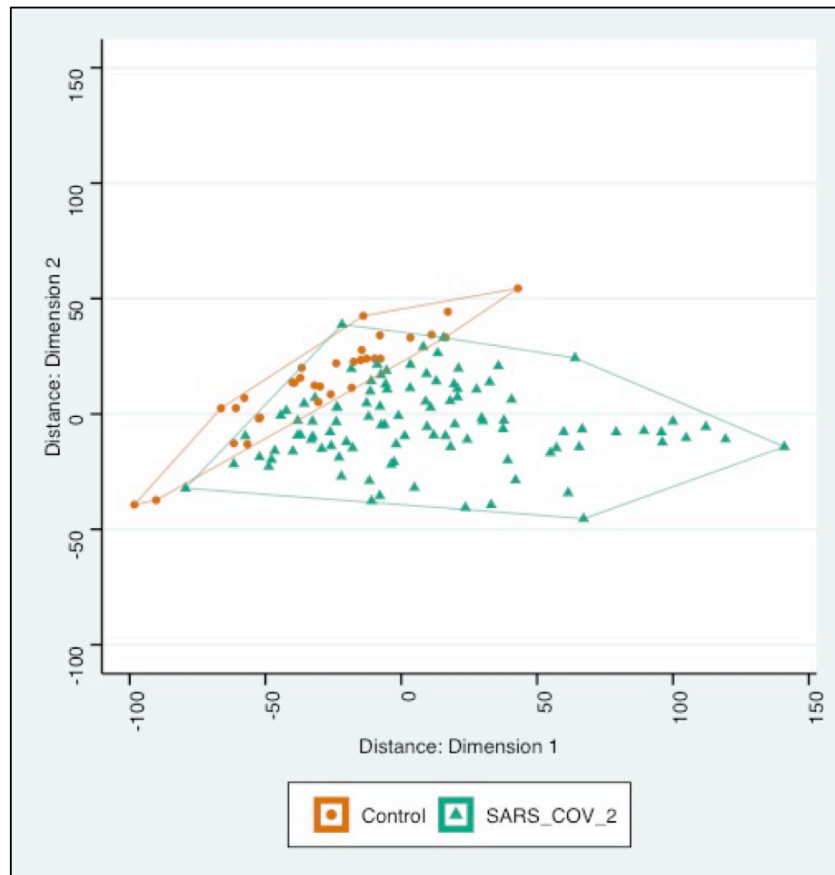

Supplementary figure 3. Multidimensional scaling (MDS) of differential IgM peptide signals in assays of sera from subjects with a history of infection with SARS-CoV-2 (n=100) or without historical exposure to SARS-CoV-2 (controls) (n=32). Based on MDS analysis, samples with exposure of SARS-CoV-2 samples (green) versus controls (red) clustered in overlapping groups.

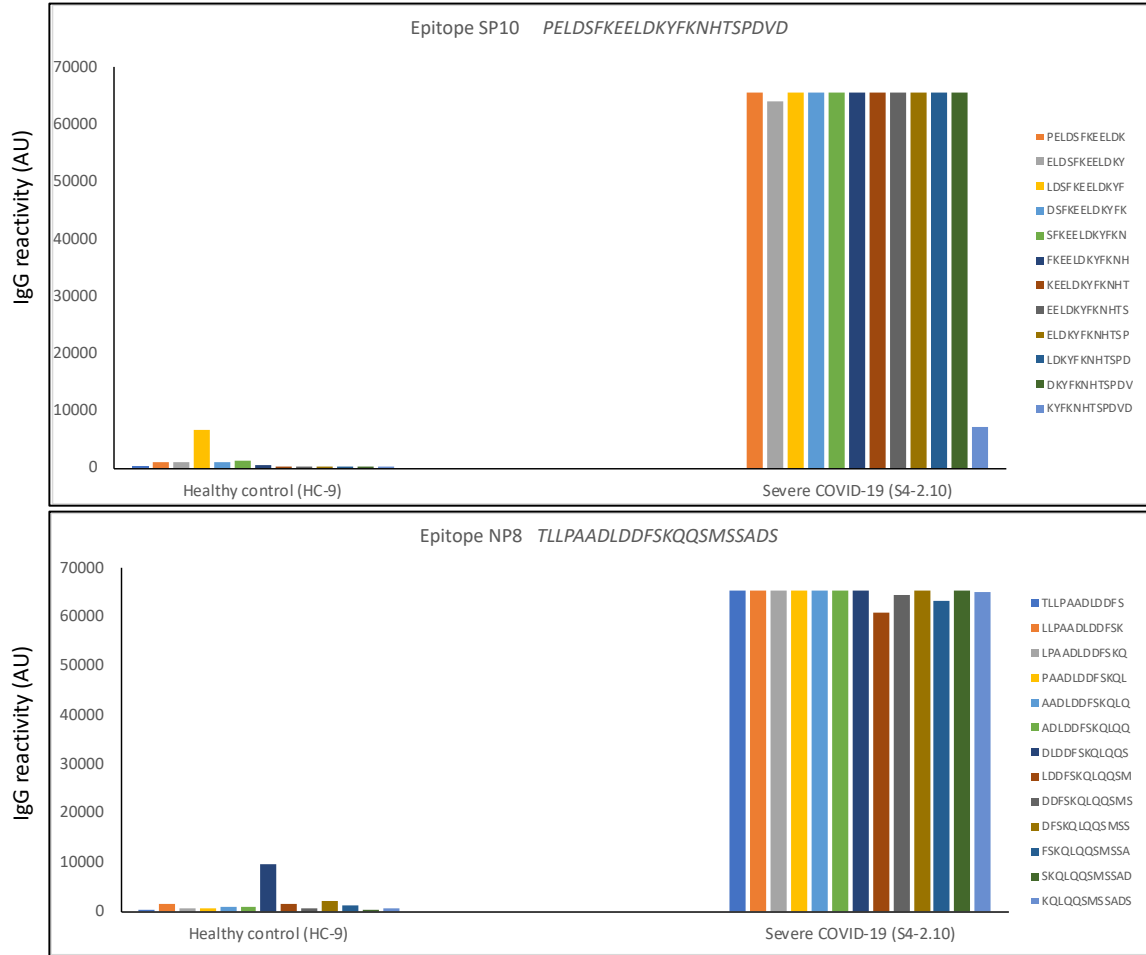

Supplementary figure 4. Illustration of overlapping 12 aa peptides reactivity and formation of SP10 and NP8 epitopes. Reactivity was measured in arbitrary units (X axis) and compared between in a severely ill COVID-19 patient versus healthy control sample (Y axis).

|                                               | <b>Virus database</b>                  | <b>No. of protein sequences</b> | <b>Total redundant "12-aa" peptides</b> | <b>Total unique "12-aa" peptides</b> |
|-----------------------------------------------|----------------------------------------|---------------------------------|-----------------------------------------|--------------------------------------|
| 1                                             | <i>SARS-CoV-2-MN908947-CDS</i>         | 10                              | 9591                                    | 9591                                 |
| 2                                             | <i>Human-229E-CoV-PDB</i>              | 662                             | 576999                                  | 15756                                |
| 3                                             | <i>Human-HKU1-CoV-PDB</i>              | 721                             | 554447                                  | 16390                                |
| 4                                             | <i>Human-NC63-CoV-PDB</i>              | 1320                            | 1000287                                 | 16392                                |
| 5                                             | <i>Human-OC43-CoV-PDB</i>              | 2667                            | 2679272                                 | 29635                                |
| 6                                             | <i>MERS-CoV-PDB</i>                    | 7253                            | 8604059                                 | 54188                                |
| 7                                             | <i>SARS-CoV-PDB</i>                    | 1996                            | 1484140                                 | 29791                                |
| 8                                             | <i>Human-CoV-variants-VIPR-PDB</i>     | 12131                           | 9880717                                 | 101145                               |
| 9                                             | <i>Bat-CoV-ZC45</i>                    | 11                              | 9678                                    | 9678                                 |
| 10                                            | <i>Bat-CoV-ZXC21</i>                   | 11                              | 9655                                    | 9655                                 |
| 11                                            | <i>Redundant-non-specific-peptides</i> | NA                              | NA                                      | 1000                                 |
| Total number of unique and redundant peptides |                                        |                                 | 24779921                                | 283630                               |
| <b>Total peptides in HCoV-SeroChip</b>        |                                        |                                 | <b>172665</b>                           |                                      |

Supplementary Table 1. Design and characteristics of HCoV-peptide array

|                                                       | Asymptomatic<br>(n=6)  | Non-severe<br>(n=22) | Severe<br>(n=22) | SARS-CoV-1<br>(n=11) | Healthy<br>(n=10) | Other HCoV<br>(n=11) |
|-------------------------------------------------------|------------------------|----------------------|------------------|----------------------|-------------------|----------------------|
| Gender (M/F)                                          | 2/4                    | 13/9                 | 14/8             | 1/10                 | 5/5               | --                   |
| Age (years)                                           | 43.5±15.08             | 44.0±16.73           | 60.1±12.37       | 24.4±5.0             | 46.3±7.3          | --                   |
| Time of collection (post onset of symptoms days, POD) |                        |                      |                  |                      |                   |                      |
| First collection                                      | day of hospitalisation | 12.9±5.9             | 9.6±3.5          | --                   | --                | --                   |
| Second collection                                     | 14.5±4.6               | 34.7±8.3             | 24.8±6.8         | --                   | --                | --                   |
| Symptoms                                              |                        |                      |                  |                      |                   |                      |
| Cough                                                 | 0(0%)                  | 19(86%)              | 15(68%)          | --                   | --                | --                   |
| Fever                                                 | 1(17%)                 | 16(73%)              | 19(86%)          | --                   | --                | --                   |
| Dyspnea                                               | 0(0%)                  | 2(9%)                | 5(23%)           | --                   | --                | --                   |
| Snivel                                                | 0(0%)                  | 3(14%)               | 1(5%)            | --                   | --                | --                   |
| Sore throat                                           | 0(0%)                  | 4(18%)               | 5(23%)           | --                   | --                | --                   |
| Diarrhea/Vomit/Stomach ache                           | 0(0%)                  | 7(32%)               | 8(36%)           | --                   | --                | --                   |
| Underlying diseases                                   |                        |                      |                  |                      |                   |                      |
| Cancer                                                | 1(17%)                 | 2(9%)                | 0(0%)            | --                   | --                | --                   |
| Thyroid disease                                       | 1(17%)                 | 0(0%)                | 2(9%)            | --                   | --                | --                   |
| Diabetes                                              | 0(0%)                  | 2(9%)                | 3(14%)           | --                   | --                | --                   |
| Hypertension                                          | 0(0%)                  | 5(23%)               | 6(27%)           | --                   | --                | --                   |
| Arthritis                                             | 0(0%)                  | 1(5%)                | 0(0%)            | --                   | --                | --                   |
| Kidney disease                                        | 0(0%)                  | 1(5%)                | 1(5%)            | --                   | --                | --                   |
| Appendicitis History                                  | 0(0%)                  | 1(5%)                | 1(5%)            | --                   | --                | --                   |
| Gastritis history                                     | 0(0%)                  | 0(0%)                | 1(5%)            | --                   | --                | --                   |
| Spinal diseases                                       | 0(0%)                  | 0(0%)                | 2(9%)            | --                   | --                | --                   |
| Bronchiectasis                                        | 0(0%)                  | 0(0%)                | 1(5%)            | --                   | --                | --                   |
| Skin disease                                          | 0(0%)                  | 0(0%)                | 1(5%)            | --                   | --                | --                   |
| Treatment                                             |                        |                      |                  |                      |                   |                      |
| Antibiotic                                            | 3(50%)                 | 17(77%)              | 22(100%)         | --                   | --                | --                   |
| Antivirus                                             | 5(83%)                 | 19(86%)              | 21(95%)          | --                   | --                | --                   |
| Interferon                                            | 0(0%)                  | 1(5%)                | 3(14%)           | --                   | --                | --                   |
| TCM                                                   | 1(17%)                 | 7(32%)               | 6(27%)           | --                   | --                | --                   |
| Globulin                                              | 0(0%)                  | 11(50%)              | 21(95%)          | --                   | --                | --                   |
| Chloroquine                                           | 5(83%)                 | 16(73%)              | 9(41%)           | --                   | --                | --                   |

Supplementary Table 2. Clinical characteristics of patients by groups with SARS-CoV-2 infection and controls.

| Sample-ID | 229E-CoV                    | NL63-CoV | OC4-3 CoV | HKU1-CoV |
|-----------|-----------------------------|----------|-----------|----------|
| PPA-0166  | ++++                        | N        | I         | ++       |
| PPA-0178  | +++                         | +        | I         | I        |
| PPA-0172  | ++++                        | I        | +         | ++++     |
| PPA-0176  | ++++                        | ++++     | ++++      | ++++     |
| PPA-0165  | N                           | N        | N         | /        |
| PPA-0170  | /                           | /        | N         | N        |
| PPA-0177  | N                           | /        | N         | N        |
| PPA-0168  | N                           | +        | I         | ++++     |
| PPA-0179  | +                           | ++       | N         | ++++     |
| PPA-0173  | N                           | I        | +++       | ++++     |
| PPA-0169  | N                           | ++++     | +++       | N        |
| NA        | Data not available          |          |           |          |
| I         | <i>Indeterminate</i>        |          |           |          |
| N         | <i>Negative</i>             |          |           |          |
| ++        | <i>Positive</i>             |          |           |          |
| +++       | <i>Strong Positive</i>      |          |           |          |
| ++++      | <i>Very Strong Positive</i> |          |           |          |

Supplementary Table 3. IgG Immunoreactivity of other HCoV controls using S protein based specific ELISAs for four seasonal human coronaviruses (OC43, 229E, HKU1 and NL63).

| Epitope ID | Epitope name | Epitope sequence               | Group 1-Severe cases of COVID-19 (n=22) |                                          |                                         | Group 2-Mild cases of COVID-19 (n=22)   |                                          |                                         | Group 3-Asymptomatic cases of           |                                          |                                         |
|------------|--------------|--------------------------------|-----------------------------------------|------------------------------------------|-----------------------------------------|-----------------------------------------|------------------------------------------|-----------------------------------------|-----------------------------------------|------------------------------------------|-----------------------------------------|
|            |              |                                | Reactive in first time point collection | Reactive in second time point collection | Reactive in both time point collections | Reactive in first time point collection | Reactive in second time point collection | Reactive in both time point collections | Reactive in first time point collection | Reactive in second time point collection | Reactive in both time point collections |
| 1          | OP1          | TAYNGYLTSSSK TP                | 1/22 (4.5%)                             | 0/22(0%)                                 | 4/22(18.2%)                             | 1/22(4.5%)                              | 1/22(4.5%)                               | 4/22(18.2%)                             | 0/6(0%)                                 | 0/6(0%)                                  | 0/6(0%)                                 |
| 2          | OP2          | LVPNQPYPNASF DNF               | 0/22(0%)                                | 4/22(18.2%)                              | 8/22(36.4%)                             | 1/22(4.5%)                              | 1/22(4.5%)                               | 2/22 (9.1%)                             | 0/6(0%)                                 | 0/6(0%)                                  | 0/6(0%)                                 |
| 3          | OP3          | NRFTTLLNDFNL VAMK              | 0/22(0%)                                | 0/22(0%)                                 | 1/22 (4.5%)                             | 1/22(4.5%)                              | 0/22(0%)                                 | 3/22(13.6%)                             | 0/6(0%)                                 | 0/6(0%)                                  | 0/6(0%)                                 |
| 4          | OP4          | QGLLPKNSIDA FKLNIK             | 2/22 (9.1%)                             | 2/22 (9.1%)                              | 3/22(13.6%)                             | 0/22(0%)                                | 2/22 (9.1%)                              | 4/22(18.2%)                             | 0/6(0%)                                 | 0/6(0%)                                  | 0/6(0%)                                 |
| 5          | OP5          | NTCVGSDNVTD FNAIATCDW          | 0/22(0%)                                | 8/22(36.4%)                              | 5/22(22.7%)                             | 2/22 (9.1%)                             | 3/22(13.6%)                              | 3/22(13.6%)                             | 0/6(0%)                                 | 0/6(0%)                                  | 0/6(0%)                                 |
| 6          | OP6          | FYSYATHSDKFT DGV               | 2/22 (9.1%)                             | 6/22 (27.3%)                             | 5/22(22.7%)                             | 0/22(0%)                                | 2/22 (9.1%)                              | 0/22(0%)                                | 0/6(0%)                                 | 0/6(0%)                                  | 0/6(0%)                                 |
| 7          | ORF3-1       | EHDYQIGGYTEK WESGVKDCVVL       | 1/22 (4.5%)                             | 2/22 (9.1%)                              | 4/22(18.2%)                             | 0/22(0%)                                | 1/22 (4.5%)                              | 1/22 (4.5%)                             | 0/6(0%)                                 | 0/6(0%)                                  | 0/6(0%)                                 |
| 8          | ORF8-1       | GSKSPIQYIDIGN YTVSCLPF         | 1/22 (4.5%)                             | 5/22(22.7%)                              | 4/22(18.2%)                             | 2/22 (9.1%)                             | 1/22 (4.5%)                              | 2/22 (9.1%)                             | 0/6(0%)                                 | 0/6(0%)                                  | 0/6(0%)                                 |
| 9          | SP1          | TESNKKFLPFQQ FGRDIAD           | 0/22(0%)                                | 13/22(59.1%)                             | 3/22(13.6%)                             | 0/22(0%)                                | 8/22(36.4%)                              | 2/22 (9.1%)                             | 0/6(0%)                                 | 1/6(16.7%)                               | 1/6(16.7%)                              |
| 10         | SP2          | TDAVRDPQTLLEI LDITPCS          | 1/22 (4.5%)                             | 14/22(63.6%)                             | 4/22(18.2%)                             | 0/22(0%)                                | 10/22(45.5%)                             | 2/22 (9.1%)                             | 0/6(0%)                                 | 0/6(0%)                                  | 1/6(16.7%)                              |
| 11         | SP3          | QVAVLYQDVNVC TEVPVAIHADQL TPTW | 0/22(0%)                                | 9/22(40.9%)                              | 0/22(0%)                                | 0/22(0%)                                | 2/22 (9.1%)                              | 2/22 (9.1%)                             | 0/6(0%)                                 | 0/6(0%)                                  | 0/6(0%)                                 |
| 12         | SP4          | CASYQTQTNspr RARSV             | 0/22(0%)                                | 2/22 (9.1%)                              | 2/22 (9.1%)                             | 0/22(0%)                                | 1/22 (4.5%)                              | 0/22(0%)                                | 0/6(0%)                                 | 0/6(0%)                                  | 1/6(16.7%)                              |
| 13         | SP5          | ARSVASQSIAYT MSLGAENSVVA       | 1/22 (4.5%)                             | 5/22(22.7%)                              | 1/22 (4.5%)                             | 1/22 (4.5%)                             | 1/22 (4.5%)                              | 3/22(13.6%)                             | 0/6(0%)                                 | 0/6(0%)                                  | 1/6(16.7%)                              |
| 14         | SP6          | RALTGIAVEQDK NTQEVFAQV         | 2/22 (9.1%)                             | 7/22(31.8%)                              | 8/22(36.4%)                             | 1/22 (4.5%)                             | 4/22(18.2%)                              | 1/22 (4.5%)                             | 2/6(33.3%)                              | 0/6(0%)                                  | 0/6(0%)                                 |
| 15         | SP7          | FAQVKKQYKTPPI KDFGGFNF         | 1/22 (4.5%)                             | 4/22(18.2%)                              | 4/22(18.2%)                             | 1/22 (4.5%)                             | 3/22(13.6%)                              | 0/22(0%)                                | 0/6(0%)                                 | 0/6(0%)                                  | 1/6(16.7%)                              |
| 16         | SP8          | NFSQILPDPSKPS KRS              | 0/22(0%)                                | 3/22(13.6%)                              | 1/22 (4.5%)                             | 0/22(0%)                                | 4/22(18.2%)                              | 0/22(0%)                                | 0/6(0%)                                 | 0/6(0%)                                  | 1/6(16.7%)                              |
| 17         | SP9          | KRSFIEDLLFNKV T                | 0/22(0%)                                | 3/22(13.6%)                              | 5/22(22.7%)                             | 2/22 (9.1%)                             | 3/22(13.6%)                              | 2/22 (9.1%)                             | 1/6(16.7%)                              | 0/6(0%)                                  | 0/6(0%)                                 |
| 18         | SP10         | PELDSFKEELDKY FKNHTSPDVD       | 0/22(0%)                                | 8/22(36.4%)                              | 14/22(63.6%)                            | 0/22(0%)                                | 9/22(40.9%)                              | 9/22(40.9%)                             | 0/6(0%)                                 | 0/6(0%)                                  | 4/6(66.7%)                              |
| 19         | SP11         | SPDVLGDISGI NASVV              | 0/22(0%)                                | 8/22(36.4%)                              | 11/22(50%)                              | 1/22 (4.5%)                             | 8/22(36.4%)                              | 5/22(22.7%)                             | 0/6(0%)                                 | 0/6(0%)                                  | 0/6(0%)                                 |
| 20         | MP1          | CDIKDLPKEITVA TS               | 0/22(0%)                                | 8/22(36.4%)                              | 0/22(0%)                                | 0/22(0%)                                | 6/22 (27.3%)                             | 0/22(0%)                                | 0/6(0%)                                 | 0/6(0%)                                  | 0/6(0%)                                 |
| 21         | MP2          | QRVAGDSGFAA YSRV               | 0/22(0%)                                | 10/22(45.5%)                             | 0/22(0%)                                | 0/22(0%)                                | 4/22(18.2%)                              | 0/22(0%)                                | 0/6(0%)                                 | 0/6(0%)                                  | 0/6(0%)                                 |
| 22         | NP1          | ALLLLDRLNQLE SKMSG             | 2/22 (9.1%)                             | 4/22(18.2%)                              | 1/22 (4.5%)                             | 0/22(0%)                                | 3/22(13.6%)                              | 2/22 (9.1%)                             | 0/6(0%)                                 | 1/6(16.7%)                               | 0/6(0%)                                 |
| 23         | NP2          | NQLESKMSGKG QQQQGQTVTKK SA     | 1/22 (4.5%)                             | 7/22(31.8%)                              | 11/22(50%)                              | 0/22(0%)                                | 7/22(31.8%)                              | 8/22(36.4%)                             | 0/6(0%)                                 | 3/6(50%)                                 | 2/6(33.3%)                              |
| 24         | NP3          | QTVTKKSAAEAS KKPRQK            | 0/22(0%)                                | 5/22(22.7%)                              | 2/22 (9.1%)                             | 0/22(0%)                                | 3/22(13.6%)                              | 1/22 (4.5%)                             | 0/6(0%)                                 | 0/6(0%)                                  | 1/6(16.7%)                              |
| 25         | NP4          | RGPEQTQGNFG DQELI              | 1/22 (4.5%)                             | 0/22(0%)                                 | 4/22(18.2%)                             | 0/22(0%)                                | 1/22 (4.5%)                              | 2/22 (9.1%)                             | 0/6(0%)                                 | 0/6(0%)                                  | 1/6(16.7%)                              |
| 26         | NP5          | AYKTFPPTPEKK DKKKK             | 1/22 (4.5%)                             | 2/22 (9.1%)                              | 2/22 (9.1%)                             | 0/22(0%)                                | 2/22 (9.1%)                              | 0/22(0%)                                | 0/6(0%)                                 | 0/6(0%)                                  | 1/6(16.7%)                              |
| 27         | NP6          | KDKKKKADETQ ALPQR              | 0/22(0%)                                | 2/22 (9.1%)                              | 4/22(18.2%)                             | 0/22(0%)                                | 5/22(22.7%)                              | 0/22(0%)                                | 0/6(0%)                                 | 1/6(16.7%)                               | 1/6(16.7%)                              |
| 28         | NP7          | ADETQALPQRQ KKQQTVTLPAADL      | 1/22 (4.5%)                             | 12/22(54.5%)                             | 4/22(18.2%)                             | 1/22 (4.5%)                             | 6/22 (27.3%)                             | 3/22(13.6%)                             | 0/6(0%)                                 | 0/6(0%)                                  | 1/6(16.7%)                              |
| 29         | NP8          | TLLPAADLDDFS KQLQQSMSSAD S     | 0/22(0%)                                | 6/22 (27.3%)                             | 15/22(68.2%)                            | 1/22 (4.5%)                             | 13/22(59.1%)                             | 5/22(22.7%)                             | 0/6(0%)                                 | 1/6(16.7%)                               | 3/6(50%)                                |

Supplementary Table 4. Group and time point wise reactivity to 29 epitopes in plasma samples from COVID-19 patients



|    |                             | Severe-COVID (Early) | Severe-COVID (Late) | Mild-COVID (Early) | Mild-COVID (Late) | Asymptomatic COVID (First) | Asymptomatic COVID (second) | Other HCoV controls | Healthy controls | SARS-CoV-1 controls |
|----|-----------------------------|----------------------|---------------------|--------------------|-------------------|----------------------------|-----------------------------|---------------------|------------------|---------------------|
| 1  | LGDELGTDPYEDFQ              | 0/22 (0%)            | 0/22 (0%)           | 0/22 (0%)          | 0/22 (0%)         | 0/6 (0%)                   | 0/6 (0%)                    | 0/10 (0%)           | 1/11 (10%)       | 0/11 (0%)           |
| 2  | LYIDINGNLHPDSAT             | 0/22 (0%)            | 2/22 (10%)          | 2/22 (10%)         | 0/22 (0%)         | 0/6 (0%)                   | 0/6 (0%)                    | 0/10 (0%)           | 0/11 (0%)        | 0/11 (0%)           |
| 3  | ATKYLVDQESPFVMM             | 0/22 (0%)            | 0/22 (0%)           | 0/22 (0%)          | 0/22 (0%)         | 0/6 (0%)                   | 0/6 (0%)                    | 0/10 (0%)           | 1/11 (10%)       | 0/11 (0%)           |
| 4  | IVFDGSKCEESSA               | 0/22 (0%)            | 0/22 (0%)           | 1/22 (5%)          | 1/22 (5%)         | 0/6 (0%)                   | 0/6 (0%)                    | 0/10 (0%)           | 0/11 (0%)        | 0/11 (0%)           |
| 5  | LNDFSNSGSDVLYQP             | 0/22 (0%)            | 0/22 (0%)           | 0/22 (0%)          | 0/22 (0%)         | 0/6 (0%)                   | 0/6 (0%)                    | 1/10 (10%)          | 0/11 (0%)        | 0/11 (0%)           |
| 6  | LSFCFAVDAAKAY               | 1/22 (5%)            | 0/22 (0%)           | 0/22 (0%)          | 0/22 (0%)         | 0/6 (0%)                   | 0/6 (0%)                    | 0/10 (0%)           | 0/11 (0%)        | 0/11 (0%)           |
| 7  | YDFGDFIQITPGSG              | 0/22 (0%)            | 0/22 (0%)           | 0/22 (0%)          | 0/22 (0%)         | 0/6 (0%)                   | 0/6 (0%)                    | 1/10 (10%)          | 0/11 (0%)        | 0/11 (0%)           |
| 8  | DFIQITPGSGVPVV              | 0/22 (0%)            | 0/22 (0%)           | 0/22 (0%)          | 0/22 (0%)         | 0/6 (0%)                   | 0/6 (0%)                    | 1/10 (10%)          | 0/11 (0%)        | 0/11 (0%)           |
| 9  | FLKYNENGTITDAV              | 0/22 (0%)            | 1/22 (5%)           | 0/22 (0%)          | 0/22 (0%)         | 0/6 (0%)                   | 0/6 (0%)                    | 0/10 (0%)           | 0/11 (0%)        | 0/11 (0%)           |
| 10 | GVLTESNKKFLPFQ              | 0/22 (0%)            | 0/22 (0%)           | 0/22 (0%)          | 0/22 (0%)         | 0/6 (0%)                   | 0/6 (0%)                    | 0/10 (0%)           | 0/11 (0%)        | 1/11 (10%)          |
| 11 | YQTQTNSPRRARSVA             | 0/22 (0%)            | 1/22 (5%)           | 0/22 (0%)          | 0/22 (0%)         | 0/6 (0%)                   | 0/6 (0%)                    | 0/10 (0%)           | 0/11 (0%)        | 0/11 (0%)           |
| 12 | NTQEVFAQVKQIYK              | 1/22 (5%)            | 0/22 (0%)           | 0/22 (0%)          | 0/22 (0%)         | 0/6 (0%)                   | 0/6 (0%)                    | 0/10 (0%)           | 0/11 (0%)        | 0/11 (0%)           |
| 13 | <b>MADSNGTITVEELKKLEQWN</b> | <b>1/22 (5%)</b>     | <b>8/22 (37%)</b>   | <b>0/22 (0%)</b>   | <b>4/22 (19%)</b> | <b>0/6 (0%)</b>            | <b>1/6 (17%)</b>            | <b>0/10 (0%)</b>    | <b>0/11 (0%)</b> | <b>0/11 (0%)</b>    |
| 14 | KEPCSSGTIEGNSPFHP           | 0/22 (0%)            | 0/22 (0%)           | 0/22 (0%)          | 1/22 (5%)         | 0/6 (0%)                   | 0/6 (0%)                    | 0/10 (0%)           | 1/11 (10%)       | 0/11 (0%)           |
| 15 | TLLPAADLDDFSKQ              | 1/22 (5%)            | 1/22 (5%)           | 0/22 (0%)          | 0/22 (0%)         | 0/6 (0%)                   | 1/6 (17%)                   | 0/10 (0%)           | 0/11 (0%)        | 0/11 (0%)           |
| 16 | AADLDDFSKQLQQS              | 1/22 (5%)            | 0/22 (0%)           | 0/22 (0%)          | 0/22 (0%)         | 0/6 (0%)                   | 0/6 (0%)                    | 0/10 (0%)           | 0/11 (0%)        | 0/11 (0%)           |

Supplementary Table 5. Characteristics of selected sixteen IgM linear epitopes for detection of SARS-CoV-2 infection. Sequences (aa) are based on proteome of Severe acute respiratory syndrome coronavirus 2 isolate Wuhan-Hu-1 (Accession no. MN908947).

| Virus name                            | Epitope sequences            | Protein name                | Controls                       |                    |                 | SARS-CoV-2           |                       |                      |                       |                        |                         |             |
|---------------------------------------|------------------------------|-----------------------------|--------------------------------|--------------------|-----------------|----------------------|-----------------------|----------------------|-----------------------|------------------------|-------------------------|-------------|
|                                       |                              |                             | Healthy                        | SARS-CoV-1         | Other Human CoV | Asymptomatic (first) | Asymptomatic (Second) | Mild disease (first) | Mild disease (second) | Severe disease (first) | Severe disease (second) |             |
| Human coronavirus HKU1                | MVNPSKSGSSLLITLKT            | Nucleocapsid phosphoprotein | 0/10 (0%)                      | 0/11 (0%)          | 4/11 (37%)      | 0/6 (0%)             | 0/6 (0%)              | 0/22 (0%)            | 1/22 (5%)             | 0/22 (0%)              | 0/22 (0%)               |             |
|                                       | VKQLPEQFDLSNLSAGTQ           | Nucleocapsid phosphoprotein | 1/10 (10%)                     | 0/11 (0%)          | 2/11 (19%)      | 2/6 (34%)            | 0/6 (0%)              | 6/22 (28%)           | 6/22 (28%)            | 10/22 (46%)            | 11/22 (50%)             |             |
|                                       | SLLATLDDPYVEDSVA             | Nucleocapsid phosphoprotein | 0/10 (0%)                      | 1/11 (10%)         | 2/11 (19%)      | 0/6 (0%)             | 0/6 (0%)              | 4/22 (19%)           | 1/22 (5%)             | 5/22 (23%)             | 10/22 (46%)             |             |
|                                       | MNKSFLPQFTSDQAV              | Membrane glycoprotein       | 6/10 (60%)                     | 6/11 (55%)         | 3/11 (28%)      | 6/6 (100%)           | 4/6 (67%)             | 19/22 (87%)          | 15/22 (69%)           | 18/22 (82%)            | 21/22 (96%)             |             |
|                                       | WLNNFNVPSPNLWVERKI           | Spike glycoprotein          | 0/10 (0%)                      | 0/11 (0%)          | 2/11 (19%)      | 0/6 (0%)             | 0/6 (0%)              | 0/22 (0%)            | 0/22 (0%)             | 1/22 (5%)              | 0/22 (0%)               |             |
|                                       | ISASRYRFTVEFFNVS             | Spike glycoprotein          | 2/10 (20%)                     | 2/11 (19%)         | 4/11 (37%)      | 2/6 (34%)            | 0/6 (0%)              | 11/22 (50%)          | 10/22 (46%)           | 11/22 (50%)            | 10/22 (46%)             |             |
|                                       | SRSFFEDLDFDKVLS              | Spike glycoprotein          | 1/10 (10%)                     | 0/11 (0%)          | 1/11 (10%)      | 0/6 (0%)             | 1/6 (17%)             | 5/22 (23%)           | 3/22 (14%)            | 3/22 (14%)             | 4/22 (19%)              |             |
|                                       | VDRQVILVSNKEDFDIIQ           | orf1ab polyprotein          | 1/10 (10%)                     | 0/11 (0%)          | 1/11 (10%)      | 0/6 (0%)             | 0/6 (0%)              | 0/22 (0%)            | 2/22 (10%)            | 7/22 (32%)             | 11/22 (50%)             |             |
|                                       | LLHSKVVPVPLNLYVVV            | orf1ab polyprotein          | 2/10 (20%)                     | 1/11 (10%)         | 3/11 (28%)      | 0/6 (0%)             | 0/6 (0%)              | 1/22 (5%)            | 0/22 (0%)             | 2/22 (10%)             | 2/22 (10%)              |             |
|                                       | FDLVQYDFTDYKLEL              | orf1ab polyprotein          | 0/10 (0%)                      | 1/11 (10%)         | 1/11 (10%)      | 0/6 (0%)             | 0/6 (0%)              | 4/22 (19%)           | 2/22 (10%)            | 7/22 (32%)             | 11/22 (50%)             |             |
|                                       | PASQVIVNNDKSAAGY             | orf1ab polyprotein          | 1/10 (10%)                     | 0/11 (0%)          | 2/11 (19%)      | 0/6 (0%)             | 0/6 (0%)              | 0/22 (0%)            | 0/22 (0%)             | 4/22 (19%)             | 3/22 (14%)              |             |
|                                       | CTGSPYIDDFNKIAS              | orf1ab polyprotein          | 0/10 (0%)                      | 0/11 (0%)          | 1/11 (10%)      | 0/6 (0%)             | 1/6 (17%)             | 6/22 (28%)           | 10/22 (46%)           | 11/22 (50%)            | 14/22 (64%)             |             |
|                                       | CWETGKVPKPLNKNYVFTG          | orf1ab polyprotein          | 2/10 (20%)                     | 1/11 (10%)         | 1/11 (10%)      | 1/6 (17%)            | 2/6 (34%)             | 4/22 (19%)           | 5/22 (23%)            | 4/22 (19%)             | 5/22 (23%)              |             |
|                                       | AKVRVDCYDKFKINDTTCKY         | orf1ab polyprotein          | 0/10 (0%)                      | 1/11 (10%)         | 2/11 (19%)      | 2/6 (34%)            | 2/6 (34%)             | 2/22 (10%)           | 1/22 (5%)             | 4/22 (19%)             | 4/22 (19%)              |             |
|                                       | ISPYNSQNYVAKRVLGVQ           | orf1ab polyprotein          | 1/10 (10%)                     | 0/11 (0%)          | 1/11 (10%)      | 0/6 (0%)             | 0/6 (0%)              | 2/22 (10%)           | 2/22 (10%)            | 5/22 (23%)             | 6/22 (28%)              |             |
|                                       | EFRDYFNNDTSIV                | orf1ab polyprotein          | 2/10 (20%)                     | 1/11 (10%)         | 2/11 (19%)      | 0/6 (0%)             | 0/6 (0%)              | 3/22 (14%)           | 3/22 (14%)            | 6/22 (28%)             | 8/22 (37%)              |             |
|                                       | RKASGLFDIAWDAFVAI            | orf1ab polyprotein          | 2/10 (20%)                     | 0/11 (0%)          | 1/11 (10%)      | 0/6 (0%)             | 0/6 (0%)              | 2/22 (10%)           | 1/22 (5%)             | 0/22 (0%)              | 1/22 (5%)               |             |
|                                       | NVGEPIISQPSKLLNG             | orf1ab polyprotein          | 0/10 (0%)                      | 2/11 (19%)         | 1/11 (10%)      | 1/6 (17%)            | 1/6 (17%)             | 0/22 (0%)            | 0/22 (0%)             | 2/22 (10%)             | 1/22 (5%)               |             |
|                                       | ISYLNRRAGSSAARLEPC           | orf1ab polyprotein          | 0/10 (0%)                      | 1/11 (10%)         | 2/11 (19%)      | 0/6 (0%)             | 0/6 (0%)              | 0/22 (0%)            | 0/22 (0%)             | 0/22 (0%)              | 0/22 (0%)               |             |
| Human coronavirus NL63                | CIKACEVVVTLNLSAGWPLNFKGKA    | orf1ab polyprotein          | 1/10 (10%)                     | 1/11 (10%)         | 3/11 (28%)      | 0/6 (0%)             | 0/6 (0%)              | 1/22 (5%)            | 2/22 (10%)            | 1/22 (5%)              | 3/22 (14%)              |             |
|                                       | VFINKYGLDFNFEH               | orf1ab polyprotein          | 0/10 (0%)                      | 0/11 (0%)          | 1/11 (10%)      | 0/6 (0%)             | 0/6 (0%)              | 0/22 (0%)            | 0/22 (0%)             | 5/22 (23%)             | 5/22 (23%)              |             |
|                                       | TVLNASIPESKPLADDDSA          | Nucleocapsid phosphoprotein | 6/10 (60%)                     | 7/11 (64%)         | 3/11 (28%)      | 3/6 (50%)            | 3/6 (50%)             | 15/22 (69%)          | 17/22 (78%)           | 15/22 (69%)            | 21/22 (96%)             |             |
|                                       | ASQEGVLSEREKLLHI             | Membrane glycoprotein       | 0/10 (0%)                      | 0/11 (0%)          | 2/11 (19%)      | 0/6 (0%)             | 0/6 (0%)              | 0/22 (0%)            | 1/22 (5%)             | 1/22 (5%)              | 2/22 (10%)              |             |
|                                       | QFGLQDGFYSANFLDDNVL          | Spike glycoprotein          | 6/10 (60%)                     | 3/11 (28%)         | 4/11 (37%)      | 1/6 (17%)            | 1/6 (17%)             | 6/22 (28%)           | 7/22 (32%)            | 8/22 (37%)             | 13/22 (60%)             |             |
|                                       | CDCGSKLPYEFKRVHVQ            | Spike glycoprotein          | 7/10 (70%)                     | 0/11 (0%)          | 3/11 (28%)      | 1/6 (17%)            | 2/6 (34%)             | 8/22 (37%)           | 6/22 (28%)            | 12/22 (55%)            | 15/22 (69%)             |             |
|                                       | FDLVQYDFTDYKLEL              | nsp9                        | 0/10 (0%)                      | 1/11 (10%)         | 1/11 (10%)      | 0/6 (0%)             | 0/6 (0%)              | 4/22 (19%)           | 2/22 (10%)            | 7/22 (32%)             | 12/22 (55%)             |             |
|                                       | SQVIVNNDKSAAGY               | nsp9                        | 0/10 (0%)                      | 0/11 (0%)          | 2/11 (19%)      | 0/6 (0%)             | 0/6 (0%)              | 0/22 (0%)            | 0/22 (0%)             | 6/22 (28%)             | 9/22 (41%)              |             |
|                                       | LSTCDGQKFTDESFKYKMY          | nsp9                        | 1/10 (10%)                     | 0/11 (0%)          | 2/11 (19%)      | 0/6 (0%)             | 0/6 (0%)              | 0/22 (0%)            | 1/22 (5%)             | 1/22 (5%)              | 6/22 (28%)              |             |
|                                       | FPLKLAGTAVINLRAD             | nsp13                       | 0/10 (0%)                      | 0/11 (0%)          | 2/11 (19%)      | 0/6 (0%)             | 0/6 (0%)              | 0/22 (0%)            | 0/22 (0%)             | 0/22 (0%)              | 0/22 (0%)               |             |
| Human coronavirus OC43                | HATRDSIIGNFPLQL              | nsp11                       | 1/10 (10%)                     | 0/11 (0%)          | 1/11 (10%)      | 0/6 (0%)             | 0/6 (0%)              | 5/22 (23%)           | 6/22 (28%)            | 2/22 (10%)             | 6/22 (28%)              |             |
|                                       | CTGSPYIDDFNRIAS              | nsp10                       | 0/10 (0%)                      | 0/11 (0%)          | 1/11 (10%)      | 0/6 (0%)             | 0/6 (0%)              | 2/22 (10%)           | 2/22 (10%)            | 3/22 (14%)             | 5/22 (23%)              |             |
|                                       | AKVRVCEYDKFKINDTTRKYV        | nsp10                       | 0/10 (0%)                      | 2/11 (19%)         | 2/11 (19%)      | 1/6 (17%)            | 2/6 (34%)             | 1/22 (5%)            | 3/22 (14%)            | 5/22 (23%)             | 5/22 (23%)              |             |
|                                       | ASSRSIEDLDFDKVLS             | Spike glycoprotein          | 5/10 (50%)                     | 5/11 (46%)         | 3/11 (28%)      | 1/6 (17%)            | 3/6 (50%)             | 13/22 (60%)          | 14/22 (64%)           | 13/22 (60%)            | 16/22 (73%)             |             |
|                                       | SQVIVNNDKSAAGY               | orf1ab polyprotein          | 0/10 (0%)                      | 0/11 (0%)          | 2/11 (19%)      | 0/6 (0%)             | 0/6 (0%)              | 0/22 (0%)            | 0/22 (0%)             | 0/22 (0%)              | 0/22 (0%)               |             |
|                                       | LSTCDGQKFTDESFKYKMY          | orf1ab polyprotein          | 1/10 (10%)                     | 0/11 (0%)          | 2/11 (19%)      | 0/6 (0%)             | 0/6 (0%)              | 0/22 (0%)            | 1/22 (5%)             | 1/22 (5%)              | 6/22 (28%)              |             |
|                                       | AETQKATEAFKQSYA              | orf1ab polyprotein          | 0/10 (0%)                      | 0/11 (0%)          | 1/11 (10%)      | 0/6 (0%)             | 0/6 (0%)              | 0/22 (0%)            | 0/22 (0%)             | 0/22 (0%)              | 0/22 (0%)               |             |
|                                       | SWEIGKVPKPLNKNYVFTG          | orf1ab polyprotein          | 0/10 (0%)                      | 0/11 (0%)          | 1/11 (10%)      | 2/6 (34%)            | 2/6 (34%)             | 5/22 (23%)           | 4/22 (19%)            | 5/22 (23%)             | 6/22 (28%)              |             |
|                                       | AKVRVCEYDKFKINDTTRKYV        | orf1ab polyprotein          | 0/10 (0%)                      | 2/11 (19%)         | 2/11 (19%)      | 1/6 (17%)            | 2/6 (34%)             | 1/22 (5%)            | 3/22 (14%)            | 5/22 (23%)             | 8/22 (37%)              |             |
|                                       | HATRDSIIGNFPLQL              | orf1ab polyprotein          | 1/10 (10%)                     | 0/11 (0%)          | 1/11 (10%)      | 0/6 (0%)             | 0/6 (0%)              | 6/22 (28%)           | 7/22 (32%)            | 2/22 (10%)             | 6/22 (28%)              |             |
|                                       | Human coronavirus 229E       | DVIDNEIVKPNISLCVPL          | orf1ab polyprotein             | 3/10 (30%)         | 3/11 (28%)      | 4/11 (37%)           | 1/6 (17%)             | 0/6 (0%)             | 9/22 (41%)            | 11/22 (50%)            | 16/22 (73%)             | 19/22 (87%) |
|                                       |                              | KHSDFGLGDLVDSYFEND          | orf1ab polyprotein             | 2/10 (20%)         | 0/11 (0%)       | 1/11 (10%)           | 0/6 (0%)              | 1/6 (17%)            | 10/22 (46%)           | 7/22 (32%)             | 15/22 (69%)             | 19/22 (87%) |
|                                       |                              | CITSREVVVTLNLSKSA           | orf1ab polyprotein             | 0/10 (0%)          | 0/11 (0%)       | 3/11 (28%)           | 0/6 (0%)              | 0/6 (0%)             | 0/22 (0%)             | 0/22 (0%)              | 2/22 (10%)              | 1/22 (5%)   |
|                                       |                              | DVIDNEIVKPNISLCVPL          | orf1ab polyprotein             | 3/10 (30%)         | 3/11 (28%)      | 4/11 (37%)           | 1/6 (17%)             | 0/6 (0%)             | 10/22 (46%)           | 11/22 (50%)            | 16/22 (73%)             | 19/22 (87%) |
|                                       |                              | KHSDFGLGDLVDSYFEND          | orf1ab polyprotein             | 2/10 (20%)         | 0/11 (0%)       | 1/11 (10%)           | 0/6 (0%)              | 0/6 (0%)             | 12/22 (55%)           | 7/22 (32%)             | 15/22 (69%)             | 19/22 (87%) |
|                                       |                              | SARS-CoV-1                  | LYEQVVMYLDNLKPRVPEAPKQEEPPNTED | orf1ab polyprotein | 4/10 (40%)      | 7/11 (64%)           | 3/11 (28%)            | 3/6 (50%)            | 4/6 (67%)             | 12/22 (55%)            | 14/22 (64%)             | 13/22 (60%) |
|                                       | VSVSSPDAVTTYNGYLTSSSKTS EEHF |                             | nsp3                           | 2/10 (20%)         | 3/11 (28%)      | 0/11 (0%)            | 0/6 (0%)              | 0/6 (0%)             | 10/22 (46%)           | 10/22 (46%)            | 7/22 (32%)              | 12/22 (55%) |
|                                       | LGDELGTDPIDEDYEQWNTKHGSGALR  |                             | orf1ab polyprotein             | 3/10 (30%)         | 3/11 (28%)      | 2/11 (19%)           | 0/6 (0%)              | 0/6 (0%)             | 10/22 (46%)           | 13/22 (60%)            | 17/22 (78%)             | 18/22 (82%) |
|                                       | FTLRISITAPVKIDNASPASTVHATA   |                             | Orf3                           | 0/10 (0%)          | 4/11 (37%)      | 0/11 (0%)            | 1/6 (17%)             | 1/6 (17%)            | 0/22 (0%)             | 1/22 (5%)              | 0/22 (0%)               | 1/22 (5%)   |
| TIVVTEGDGISTPKLQEDYQGGYSEDR           | Orf3                         |                             | 0/10 (0%)                      | 6/11 (55%)         | 0/11 (0%)       | 0/6 (0%)             | 0/6 (0%)              | 0/22 (0%)            | 0/22 (0%)             | 2/22 (10%)             | 1/22 (5%)               |             |
| SSGVANPAMDPIYDEPTTTSVPL               | Orf3                         |                             | 1/10 (10%)                     | 5/11 (46%)         | 0/11 (0%)       | 1/6 (17%)            | 0/6 (0%)              | 0/22 (0%)            | 2/22 (10%)            | 4/22 (19%)             | 8/22 (37%)              |             |
| MADNGTITVEELKQLLEQWNLVIG              | membrane glycoprotein        |                             | 0/10 (0%)                      | 7/11 (64%)         | 0/11 (0%)       | 0/6 (0%)             | 1/6 (17%)             | 1/22 (5%)            | 15/22 (69%)           | 4/22 (19%)             | 13/22 (60%)             |             |
| TPKDHGTRNPNNAATVQLQPQGITLPGFYAEGSRGGS | Nucleocapsid phosphoprotein  |                             | 0/10 (0%)                      | 6/11 (55%)         | 1/11 (10%)      | 2/6 (34%)            | 3/6 (50%)             | 10/22 (46%)          | 16/22 (73%)           | 15/22 (69%)            | 22/22 (100%)            |             |
| FSLDVSEKSGNFKHLRFVVF                  | spike glycoprotein           |                             | 1/10 (10%)                     | 4/11 (37%)         | 0/11 (0%)       | 0/6 (0%)             | 0/6 (0%)              | 1/22 (5%)            | 2/22 (10%)            | 1/22 (5%)              | 4/22 (19%)              |             |

Supplementary Table 6. List of selected 53 IgG linear IgG epitopes for detection of HKU-1, NL63, OC43, 229E, SARS-CoV-1. Sequences (aa) are based on proteome of reference sequences from NCBI.
