# Supplementary material for: Immunoreactive peptide maps of SARS-CoV-2
Source: PubMed Central journal article supplement (PMC7881038; doi:10.1038/s42003-021-01743-9), 2021-02-12
Supplement: 42003_2021_1743_MOESM2_ESM.pdf [file 42003_2021_1743_MOESM2_ESM.pdf]

## Description of Additional Supplementary Files

**File name:** Supplementary Data 1

**Description:** Aggregate IgG peptide reactivity data

**File name:** Supplementary Data 2

**Description:** Aggregate IgM peptide reactivity data

**File name:** Supplementary Data 3

**Description:** MDS-IgG significant peptides- source data for Figure 1.A

**File name:** Supplementary Data 4

**Description:** Heatmap source data for Figure 1.B

**File name:** Supplementary Data 5

**Description:** List of all 163 IgG linear epitopes for detection of SARS-CoV-2 infection

**File name:** Supplementary Data 6

**Description:** Box plots IgG Source Data for Supplementary Figure 2

**File name:** Supplementary Data 7

**Description:** Reactivity with each of these 29 epitopes for the individual plasma samples

**File name:** Supplementary Data 8

**Description:** MDS IgM significant peptides source data for Supplementary Figure 3
